# Supplementary material for: Hypoxia inducible factors are dispensable for myeloid cell migration into the inflamed mouse eye
Source: PubMed Central journal article supplement (PMC5256030; doi:10.1038/srep40830), 2017-01-23
Supplement: srep40830-s1.pdf [file srep40830-s1.pdf]

# Hypoxia inducible factors are dispensable for myeloid cell migration into the inflamed mouse eye

Peter J Gardner<sup>1\*#</sup>, Sidath E Liyanage<sup>1#</sup>, Enrico Cristante<sup>1</sup>, Robert D Sampson<sup>1</sup>,  
Andrew D Dick<sup>1,2,3</sup>, Robin R Ali<sup>1,2</sup> and James W Bainbridge<sup>1,2</sup>

**1** UCL Institute of Ophthalmology, Genetics department (London, (United Kingdom)

**2** NIHR Biomedical Research Centre for Ophthalmology, Moorfields Eye Hospital (London, (United Kingdom)

**3** University of Bristol, Academic Unit of Ophthalmology (Bristol, (United Kingdom)

# Authors contributed equally

\*Corresponding author: Dr. Peter J Gardner email: [p.gardner@ucl.ac.uk](mailto:p.gardner@ucl.ac.uk)

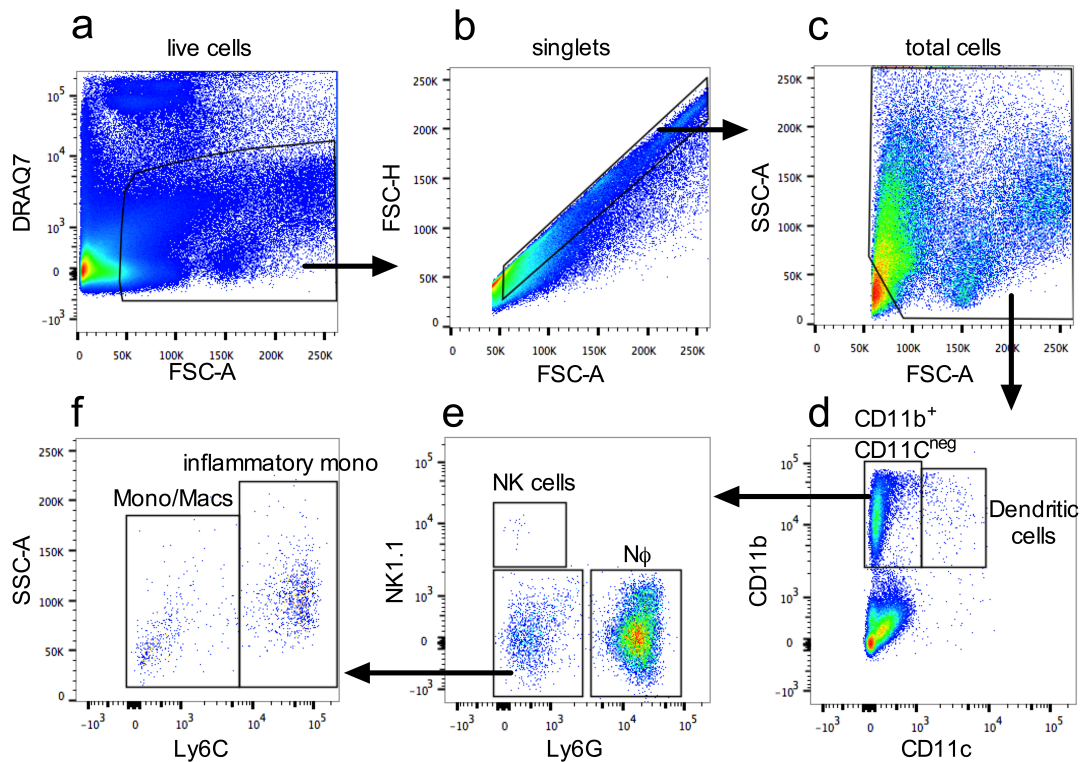

**Supplemental Figure 1. Flow cytometry gating strategy.** Flow cytometric gating strategy for myeloid cells in the mouse eye 18 hours after EIU induction in WT C57BL/6 mice; (a) live cells are gated using the DRAQ7 dye to stain dead cells (b) singlets are gated, (c) based on event size and granularity debris and non leukocytes are gated out, (d) myeloid cells are gated away from retinal cells using CD11b but excluding CD11c<sup>+</sup> dendritic cells from analysis, (e) cells are gated for (NK1.1<sup>+</sup>) Natural killer cells and (Ly6G<sup>+</sup>) Neutrophils, (f) the remaining cells are gated using expression of Ly6C to discriminate (Ly6C<sup>lo-neg</sup>) monocyte/macrophages and (Ly6C<sup>hi</sup>) inflammatory monocytes.

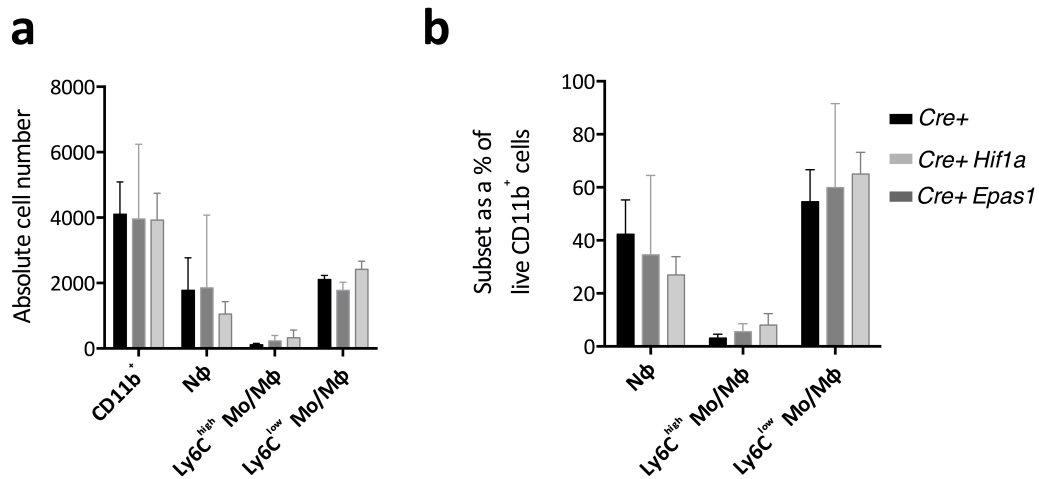

**Supplemental Figure 2. Assessment of EIU at 48 hrs post induction.** Flow cytometric analyses of (a) absolute cell numbers and (b) proportions of myeloid subsets infiltrated in the eye 48 hours after EIU induction in *Lysm*<sup>Cre/+</sup> animals and mice with myeloid cells deficient in *Hif1a* or *Epas1*: Myeloid cell populations are defined using standard gating strategy. Nφ = neutrophils; Mo/Mφ - monocyte/macrophages. Graphs show mean ± SD; n = 10 - 12 injected eyes per group.

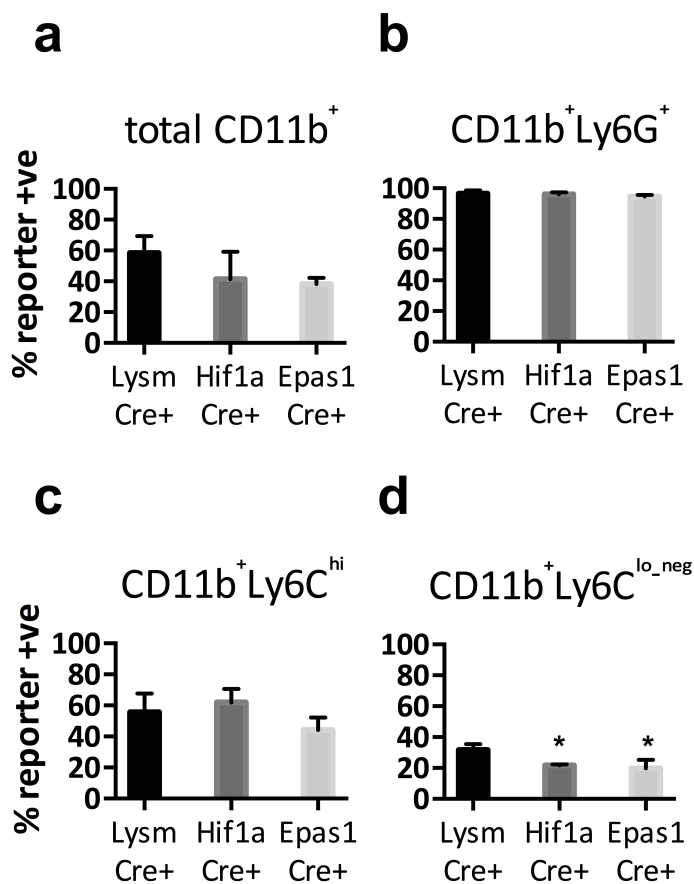

**Supplemental Figure 3. Assessment of the presence of HIF knock-out cells in the eye during EIU.** Flow cytometric analyses of GFP production driven by *Lysm*/Cre-mediated deletion of a floxed stop codon in floxed *Hif1a* and *Epas1* mice. Data show the proportion of myeloid subsets positive for GFP infiltrating the eye during EIU as compared to *Lysm*<sup>Cre/+</sup> eYFP reporter animals, a) total CD11b<sup>+</sup> myeloid; b) CD11b+Ly6G Neutrophils; c) CD11b+Ly6C<sup>hi</sup>; d) CD11b+Ly6C<sup>lo-neg</sup>. Myeloid cell populations are defined using standard gating strategy. Graphs show mean  $\pm$  SD; n = 3 - 5 injected eyes per group, Kruskal-Wallis one-way ANOVA, \* P=0.0165.

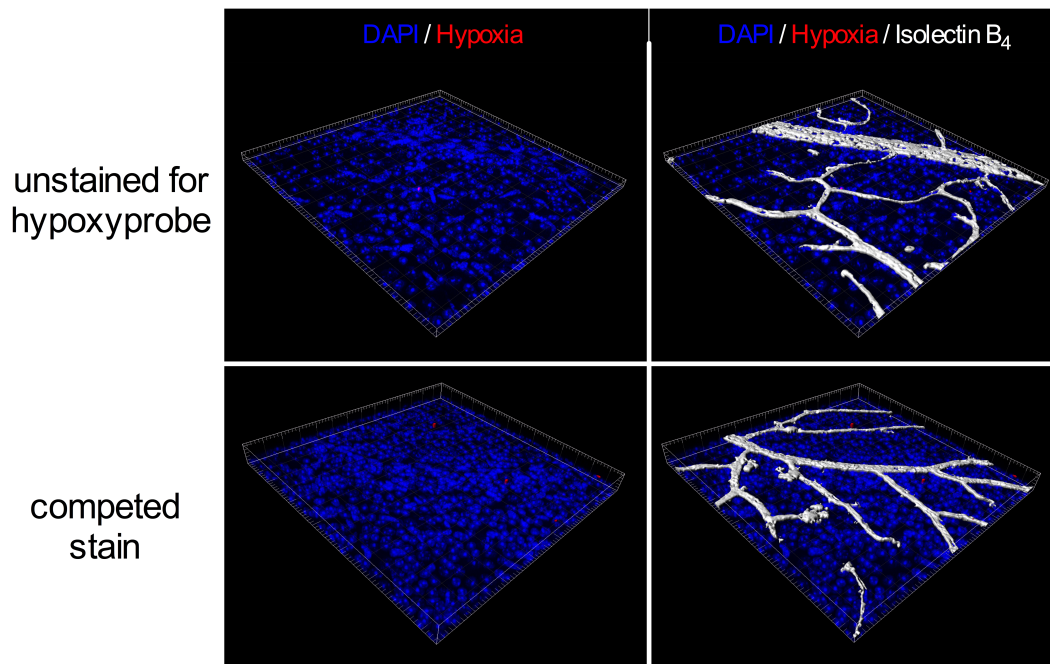

**Supplemental Figure 4. Flat mount retina controls for hypoxia staining.** 3-dimensional reconstructed imaging of superficial plexus from flat mounted retinæ of PHZ treated mice either unstained for hypoxyprobe (no anti-hypoxyprobe antibody) or PHZ mice following two i.p. injections with hypoxyprobe 12 and 2 hrs prior to culling and Hypoxyprobe-competed stain and staining with DAPI, hypoxyprobe and Isolectin.

| figure 1 |                      | cell numbers |                      | percentages |  |
|----------|----------------------|--------------|----------------------|-------------|--|
| Cre      | CD11b <sup>+</sup>   | 0.697424     |                      |             |  |
|          | Nφ                   | 0.750487     | Nφ                   | 0.696097    |  |
|          | Ly6C <sup>high</sup> |              | Ly6C <sup>high</sup> |             |  |
|          | Mo/Mφ                | 0.970296     | Mo/Mφ                | 0.837179    |  |
|          | Ly6C <sup>low</sup>  |              | Ly6C <sup>low</sup>  |             |  |
|          | Mo/Mφ                | 0.671288     | Mo/Mφ                | 0.687397    |  |
|          | NK                   | 0.977758     | NK                   | 0.947649    |  |

| figure 3 |                      | cell numbers |                      | percentages |  |
|----------|----------------------|--------------|----------------------|-------------|--|
| Vhl      | CD11b <sup>+</sup>   | 0.815316     |                      |             |  |
|          | Nφ                   | 0.870075     | Nφ                   | 0.990025    |  |
|          | Ly6C <sup>high</sup> |              | Ly6C <sup>high</sup> |             |  |
|          | Mo/Mφ                | 0.820353     | Mo/Mφ                | 0.737409    |  |
|          | Ly6C <sup>low</sup>  |              | Ly6C <sup>low</sup>  |             |  |
|          | Mo/Mφ                | 0.884046     | Mo/Mφ                | 0.435415    |  |
|          | NK                   | 0.949043     | NK                   | 0.865256    |  |

| figure 2 |                      | cell numbers |                      | percentages |  |
|----------|----------------------|--------------|----------------------|-------------|--|
| Hif1a    | CD11b <sup>+</sup>   | 0.603547     |                      |             |  |
|          | Nφ                   | 0.376868     | Nφ                   | 0.0217093   |  |
|          | Ly6C <sup>high</sup> |              | Ly6C <sup>high</sup> |             |  |
|          | Mo/Mφ                | 0.521054     | Mo/Mφ                | 0.504333    |  |
|          | Ly6C <sup>low</sup>  |              | Ly6C <sup>low</sup>  |             |  |
|          | Mo/Mφ                | 0.223981     | Mo/Mφ                | 0.0386536   |  |
|          | NK                   | 0.349505     | NK                   | 0.50572     |  |

| Hif1a / Vhl |                      | cell numbers |                      | percentages |  |
|-------------|----------------------|--------------|----------------------|-------------|--|
|             | CD11b+               | 0.873441     |                      |             |  |
|             | Nφ                   | 0.881888     | Nφ                   | 0.467648    |  |
|             | Ly6C <sup>high</sup> |              | Ly6C <sup>high</sup> |             |  |
|             | Mo/Mφ                | 0.940761     | Mo/Mφ                | 0.602551    |  |
|             | Ly6C <sup>low</sup>  |              | Ly6C <sup>low</sup>  |             |  |
|             | Mo/Mφ                | 0.582693     | Mo/Mφ                | 0.595893    |  |
|             | NK                   | 0.926561     | NK                   | 0.661085    |  |

| Epas1 |                      | cell numbers |                      | percentages |  |
|-------|----------------------|--------------|----------------------|-------------|--|
|       | CD11b <sup>+</sup>   | 0.0512081    |                      |             |  |
|       | Nφ                   | 0.0605257    | Nφ                   | 0.231222    |  |
|       | Ly6C <sup>high</sup> |              | Ly6C <sup>high</sup> |             |  |
|       | Mo/Mφ                | 0.0385813    | Mo/Mφ                | 0.905162    |  |
|       | Ly6C <sup>low</sup>  |              | Ly6C <sup>low</sup>  |             |  |
|       | Mo/Mφ                | 0.774895     | Mo/Mφ                | 0.16498     |  |
|       | NK                   | 0.977471     | NK                   | 0.175579    |  |

| Epas1 / Vhl |                      | cell numbers |                      | percentages |  |
|-------------|----------------------|--------------|----------------------|-------------|--|
|             | CD11b <sup>+</sup>   | 0.286565     |                      |             |  |
|             | Nφ                   | 0.357838     | Nφ                   | 0.664635    |  |
|             | Ly6C <sup>high</sup> |              | Ly6C <sup>high</sup> |             |  |
|             | Mo/Mφ                | 0.391069     | Mo/Mφ                | 0.120752    |  |
|             | Ly6C <sup>low</sup>  |              | Ly6C <sup>low</sup>  |             |  |
|             | Mo/Mφ                | 0.0570904    | Mo/Mφ                | 0.557369    |  |
|             | NK                   | 0.162802     | NK                   | 0.653947    |  |

| Hif1a / Epas1 |                      | cell numbers |                      | percentages |  |
|---------------|----------------------|--------------|----------------------|-------------|--|
|               | CD11b <sup>+</sup>   | 0.718826     |                      |             |  |
|               | Nφ                   | 0.654876     | Nφ                   | 0.0859047   |  |
|               | Ly6C <sup>high</sup> |              | Ly6C <sup>high</sup> |             |  |
|               | Mo/Mφ                | 0.916377     | Mo/Mφ                | 0.428685    |  |
|               | Ly6C <sup>low</sup>  |              | Ly6C <sup>low</sup>  |             |  |
|               | Mo/Mφ                | 0.597299     | Mo/Mφ                | 0.0588428   |  |
|               | NK                   | 0.528388     | NK                   | 0.257931    |  |

| figure 6 |                      | cell numbers |                      | percentages |  |
|----------|----------------------|--------------|----------------------|-------------|--|
| Hif1a    | CD11b <sup>+</sup>   | 0.513827     |                      |             |  |
|          | Nφ                   | 0.493108     | Nφ                   | 0.509409    |  |
|          | Ly6C <sup>high</sup> |              | Ly6C <sup>high</sup> |             |  |
|          | Mo/Mφ                | 0.782881     | Mo/Mφ                | 0.946335    |  |
|          | Ly6C <sup>low</sup>  |              | Ly6C <sup>low</sup>  |             |  |
|          | Mo/Mφ                | 0.923466     | Mo/Mφ                | 0.209387    |  |
|          | NK                   | 0.387515     | NK                   | 0.928142    |  |

| Epas1 |                      | cell numbers |                      | percentages |  |
|-------|----------------------|--------------|----------------------|-------------|--|
|       | CD11b+               | 0.071339     |                      |             |  |
|       | Nφ                   | 0.0612485    | Nφ                   | 0.0313879   |  |
|       | Ly6C <sup>high</sup> |              | Ly6C <sup>high</sup> |             |  |
|       | Mo/Mφ                | 0.227254     | Mo/Mφ                | 0.373304    |  |
|       | Ly6C <sup>low</sup>  |              | Ly6C <sup>low</sup>  |             |  |
|       | Mo/Mφ                | 0.124648     | Mo/Mφ                | 0.0131476   |  |
|       | NK                   | 0.685331     | NK                   | 0.0296188   |  |

| Hif1a / Epas1 |                      | cell numbers |                      | percentages |  |
|---------------|----------------------|--------------|----------------------|-------------|--|
|               | CD11b <sup>+</sup>   | 0.164664     |                      |             |  |
|               | Nφ                   | 0.172859     | Nφ                   | 0.074792    |  |
|               | Ly6C <sup>high</sup> |              | Ly6C <sup>high</sup> |             |  |
|               | Mo/Mφ                | 0.0777661    | Mo/Mφ                | 0.123479    |  |
|               | Ly6C <sup>low</sup>  |              | Ly6C <sup>low</sup>  |             |  |
|               | Mo/Mφ                | 0.827501     | Mo/Mφ                | 0.0671834   |  |
|               | NK                   | 0.913782     | NK                   | 0.165067    |  |



**Supplemental Table S1. P values from statistical analyses carried out on EIU infiltrate data.** Absolute counts and myeloid subset percentages of total CD11b<sup>+</sup> cells were compared between mutant and floxed control mice as shown in Fig. 1, 2, 3 and 6, using multiple comparison t tests with statistical significance determined using the Holm-Sidak method with alpha =5.0%
